# Supplementary material for: The reluctant polymorph: investigation into the effect of self-association on the solvent mediated phase transformation and nucleation of theophylline
Source: Royal Society of Chemistry journal article supplement (doi:10.1039/c4ce02484b), 2015-01-01
Supplement: c4ce02484b1.pdf [file c4ce02484b1.pdf]

Supplementary data for

**The Reluctant Polymorph: Investigation into the effect of self-association on the solvent mediated phase transformation and nucleation of theophylline**

*Raitis Bobrovs, Linda Seton and Nicola Dempster*

**Table S1. Solubilities of theophylline Form II and Form IV in chosen solvents**

| Solvent      | c, mol/L |       |
|--------------|----------|-------|
|              | II       | IV    |
| Methanol     | 0.058    | 0.049 |
| Water        | 0.040    |       |
| Acetonitrile | 0.011    |       |
| Acetone      | 0.018    |       |
| Chloroform   | 0.021    |       |
| Formic acid  | 1.780    |       |
